# Supplementary material for: Insights into the interactions between Deverra tortuosa and Schizomyia buboniae: phytochemicals, antioxidant capacity, and enzyme inhibitory effects
Source: PeerJ. 2025 Nov 27;13:e20052. doi: 10.7717/peerj.20052 (PMC12665267; doi:10.7717/peerj.20052)
Supplement: Supplemental Information 1 [file peerj-13-20052-s001.xlsx]

## Sheet: Means
Deverra tortuosa		total flavonoids (mg Q eq/g)	total phenolic (mg GA eq/g)	total tannins (mg TA eq/g)	total flavonols (mg RT eq /g)	saponins mg/100 g	alkaloids mg/100 g	Cardiac glycosides (mg /100 g)	steroids mg/100 g		oxalates mg/100 g	phytates mg/100 g	cyanide mg/100 g		Lipids mg/100g	proteins g BSA/100 g	Carbohydrates g glucose/100g	Nutritive value (Kcal /100 g)
		249.1	83.45	48.6	193.1	2.98	2.35	66.54	1.2		32.4	5.13	18.36		2	10.995	28.69	176.74
Stem with galls		269.1	93.95	52.6	219.1	3.25	2.02	58.12	1.56		32.4	5.86	17.28		1.4	15.445	26.14	178.94
		258.6	97.45	51.6	189.6	4.32	1.68	69.25	1.34		29.6	6.59	15.39		1.6	9.795	29.49	171.54
	Mean	258.933	91.6167	50.9333	200.6	3.51667	2.01667	64.6367	1.36667		31.4667	5.86	17.01		1.66667	12.0783	28.1067	175.74
	SD	10.0042	7.28583	2.08167	16.1168	0.708684	0.335012	5.80398	0.181475		1.61658	0.73	1.5033		0.305505	2.97672	1.74952	3.8
	SE	1.05431	0.899743	0.480933	1.33819	0.280611	0.192934	0.803049	0.142		0.423816	0.2848	0.408697		0.184242	0.575105	0.440899	0.649786
Stem without galls		237.6	77.45	37.6	150.1	1.08	0.98	37.89	0.84		32.39	3.66	17.55		1.6	9.145	21.59	137.34
		259.6	82.95	50.1	147.6	1.09	0.88	40.25	0.72		28.32	2.95	14.31		1.2	7.145	24.09	135.74
		207.6	88.45	50.1	152.6	1.11	1.02	35.81	0.61		26.32	4.39	15.12		0.9	8.995	27.39	153.64
	Mean	234.933	82.95	45.9333	150.1	1.09333	0.96	37.9833	0.723333		29.01	3.66667	15.66		1.23333	8.42833	24.3567	142.24
	SD	26.1024	5.5	7.21688	2.5	0.0152753	0.072111	2.22147	0.115036		3.09327	0.720023	1.68615		0.351188	1.11393	2.90918	9.90505
	SE	1.70302	0.781736	0.895475	0.527046	0.0411977	0.0895117	0.49682	0.113057		0.586256	0.282847	0.432839		0.197537	0.351809	0.568544	1.04908
Antioxidants	DPPH	control (0)	1.95	3.9	7.8125	15.625	31.25	62.5	125	250	500	1000		Concentration (µg/mL)	Control	AA	%RSA	Stems with galls	%RSA	Stems without galls	%RSA
Ascorbic acid		1.011	0.826	0.701	0.594	0.522	0.366	0.278	0.168	0.095	0.051	0.012		1.95	1.033	0.831	19.5547	0.979	5.23	0.977	5.42
		1.09	0.833	0.715	0.591	0.512	0.362	0.267	0.199	0.099	0.053	0.011		3.9	1.033	0.711	31.1713	0.859	16.84	0.889	13.94
		0.998	0.835	0.716	0.588	0.531	0.365	0.276	0.175	0.091	0.052	0.013		7.8125	1.033	0.591	42.788	0.718	30.49	0.744	27.98
	Mean	1.033	0.831333	0.710667	0.591	0.521667	0.364333	0.273667	0.180667	0.095	0.052	0.012		15.625	1.033	0.522	49.4676	0.566	45.21	0.605	41.43
	SD	0.0497896	0.00472582	0.0083865	0.003	0.00950438	0.00208167	0.00585947	0.0162583	0.004	0.001	0.001		31.25	1.033	0.364	64.7628	0.441	57.31	0.477	53.82
	SE	0.0743786	0.0229149	0.0305259	0.0182574	0.0324968	0.0152084	0.0255157	0.0425027	0.0210819	0.0105409	0.0105409		62.5	1.033	0.274	73.4753	0.313	69.7	0.435	57.89
Deverra with galls		1.011	0.989	0.814	0.712	0.599	0.422	0.312	0.245	0.178	0.098	0.045		125	1.033	0.181	82.4782	0.248	75.99	0.312	69.8
		1.09	0.978	0.865	0.709	0.602	0.465	0.311	0.249	0.187	0.087	0.051		250	1.033	0.095	90.8035	0.181	82.48	0.236	77.15
		0.998	0.969	0.899	0.733	0.587	0.435	0.316	0.251	0.176	0.099	0.047		500	1.033	0.052	94.9661	0.095	90.8	0.139	86.54
	Mean	1.033	0.978667	0.859333	0.718	0.596	0.440667	0.313	0.248333	0.180333	0.0946667	0.0476667		1000	1.033	0.012	98.8383	0.048	95.35	0.088	91.48
	SD	0.0497896	0.0100167	0.0427824	0.0130767	0.00793725	0.022053	0.00264575	0.00305505	0.00585947	0.00665833	0.00305505
	SE	0.0743786	0.0333611	0.0689464	0.0381178	0.0296971	0.0495008	0.0171456	0.0184242	0.0255157	0.0271995	0.0184242
Deverra without galls		1.011	0.987	0.878	0.752	0.601	0.477	0.445	0.304	0.232	0.141	0.087
		1.09	0.977	0.887	0.746	0.608	0.475	0.425	0.321	0.235	0.139	0.088
		0.998	0.967	0.902	0.735	0.607	0.479	0.435	0.31	0.241	0.136	0.09
	Mean	1.033	0.977	0.889	0.744333	0.605333	0.477	0.435	0.311667	0.236	0.138667	0.0883333
	SD	0.0497896	0.01	0.0121244	0.00862168	0.00378594	0.002	0.01	0.00862168	0.00458258	0.00251661	0.00152753
	SE	0.0743786	0.0333333	0.0367036	0.030951	0.02051	0.0149071	0.0333333	0.030951	0.0225649	0.0167219	0.0130279
	FRAP	control (Amin)	50	100	150	200	250	300 (Amax)		Concentration (µg/mL)	Control	AA	%RSA	Stems with galls	%RSA	Stems without galls	%RSA
Ascorbic acid		0.388	0.606	0.699	0.802	0.901	0.998	1.055		50	0.388	0.606	32.6837	0.506	17.69	0.488	14.99
		0.387	0.603	0.702	0.8	0.899	0.991	1.051		100	0.388	0.699	46.6267	0.599	31.63	0.522	20.09
		0.389	0.609	0.696	0.804	0.903	1.007	1.059		150	0.388	0.802	62.069	0.735	52.02	0.699	46.63
	Mean	0.388	0.606	0.699	0.802	0.901	0.998667	1.055		200	0.388	0.901	76.9115	0.866	71.66	0.787	59.82
	SD	0.001	0.003	0.003	0.002	0.002	0.00802081	0.004		250	0.388	0.998	91.4543	0.942	83.06	0.835	67.02
	SE	0.0105409	0.0182574	0.0182574	0.0149071	0.0149071	0.029853	0.0210819		300	0.388	1.055	100	0.995	91	0.899	76.61
Deverra with galls		0.388	0.506	0.599	0.735	0.866	0.942	0.995
		0.387	0.503	0.598	0.731	0.865	0.939	0.991
		0.389	0.509	0.601	0.739	0.867	0.945	1.001
	Mean	0.388	0.506	0.599333	0.735	0.866	0.942	0.995667
	SD	0.001	0.003	0.00152753	0.004	0.001	0.003	0.00503322
	SE	0.0105409	0.0182574	0.0130279	0.0210819	0.0105409	0.0182574	0.0236484
Deverra without galls		0.388	0.488	0.522	0.699	0.787	0.835	0.899
		0.387	0.485	0.52	0.704	0.78	0.831	0.905
		0.389	0.493	0.524	0.694	0.794	0.839	0.894
	Mean	0.388	0.488667	0.522	0.699	0.787	0.835	0.899333
	SD	0.001	0.00404145	0.002	0.005	0.007	0.004	0.00550757
	SE	0.0105409	0.0211908	0.0149071	0.0235702	0.0278887	0.0210819	0.0247377
	H peroxide SA	control (AC)	50	100	150	200	250	300		Concentration (µg/mL)	Control	AA	%RSA	Stems with galls	%RSA	Stems without galls	%RSA
Ascorbic acid		0.843	0.502	0.412	0.325	0.206	0.097	0.023		50	0.843	0.502	40.4508	0.501	40.57	0.498	40.93
		0.842	0.5	0.41	0.321	0.204	0.096	0.021		100	0.843	0.412	51.1269	0.442	47.57	0.477	43.42
		0.845	0.504	0.414	0.329	0.209	0.099	0.025		150	0.843	0.325	61.4472	0.399	52.67	0.405	51.96
	Mean	0.843333	0.502	0.412	0.325	0.206333	0.0973333	0.023		200	0.843	0.206	75.5635	0.245	70.94	0.356	57.77
	SD	0.00152753	0.002	0.002	0.004	0.00251661	0.00152753	0.002		250	0.843	0.097	88.4935	0.145	82.8	0.245	70.94
	SE	0.0130279	0.0149071	0.0149071	0.0210819	0.0167219	0.0130279	0.0149071		300	0.843	0.023	97.2716	0.089	89.44	0.166	80.31
Deverra with galls		0.843	0.501	0.442	0.399	0.245	0.145	0.089
		0.842	0.503	0.444	0.398	0.243	0.14	0.089
		0.845	0.501	0.44	0.399	0.247	0.149	0.088
	Mean	0.843333	0.501667	0.442	0.398667	0.245	0.144667	0.0886667
	SD	0.00152753	0.0011547	0.002	0.00057735	0.002	0.00450925	0.00057735
	SE	0.0130279	0.011327	0.0149071	0.00800937	0.0149071	0.0223836	0.00800937
Deverra without galls		0.843	0.498	0.477	0.405	0.356	0.245	0.166
		0.842	0.499	0.479	0.402	0.354	0.246	0.165
		0.845	0.497	0.475	0.408	0.357	0.244	0.167
	Mean	0.843333	0.498	0.477	0.405	0.355667	0.245	0.166
	SD	0.00152753	0.001	0.002	0.003	0.00152753	0.001	0.001
	SE	0.0130279	0.0105409	0.0149071	0.0182574	0.0130279	0.0105409	0.0105409
	reducing power	control (Amin)	50	100	150	200	250	300 (Amax)			Concentration (µg/mL)	Control	AA	%RSA	Stems with galls	%RSA	Stems without galls	%RSA
Ascorbic acid		0.322	0.802	0.912	1.043	1.209	1.326	1.44			50	0.322	0.802	42.8189	0.789	41.66	0.699	33.63
		0.321	0.8	0.908	1.044	1.211	1.32	1.443			100	0.322	0.912	52.6316	0.866	48.53	0.788	41.57
		0.323	0.804	0.916	1.042	1.214	1.323	1.446			150	0.322	1.043	64.3176	0.902	51.74	0.866	48.53
	Mean	0.322	0.802	0.912	1.043	1.21133	1.323	1.443			200	0.322	1.211	79.3042	1.022	62.44	0.933	54.5
	SD	0.001	0.002	0.004	0.001	0.00251661	0.003	0.003			250	0.322	1.323	89.2953	1.199	78.23	1.002	60.66
	SE	0.0105409	0.0149071	0.0210819	0.0105409	0.0167219	0.0182574	0.0182574			300	0.322	1.443	100	1.321	89.12	1.099	69.31
Deverra with galls		0.322	0.788	0.866	0.901	1.023	1.199	1.325
		0.321	0.789	0.864	0.899	1.024	1.196	1.32
		0.323	0.791	0.867	0.905	1.02	1.201	1.319
	Mean	0.322	0.789333	0.865667	0.901667	1.02233	1.19867	1.32133
	SD	0.001	0.00152753	0.00152753	0.00305505	0.00208167	0.00251661	0.00321455
	SE	0.0105409	0.0130279	0.0130279	0.0184242	0.0152084	0.0167219	0.018899
Deverra without galls		0.322	0.697	0.787	0.866	0.931	1.001	1.1
		0.321	0.698	0.789	0.864	0.935	1.004	1.096
		0.323	0.701	0.788	0.868	0.934	1.001	1.099
	Mean	0.322	0.698667	0.788	0.866	0.933333	1.002	1.09833
	SD	0.001	0.00208167	0.001	0.002	0.00208167	0.00173205	0.00208167
	SE	0.0105409	0.0152084	0.0105409	0.0149071	0.0152084	0.0138726	0.0152084
