# Supplementary material for: Insights into the interactions between Deverra tortuosa and Schizomyia buboniae: phytochemicals, antioxidant capacity, and enzyme inhibitory effects
Source: PeerJ. 2025 Nov 27;13:e20052. doi: 10.7717/peerj.20052 (PMC12665267; doi:10.7717/peerj.20052)
Supplement: Supplemental Information 2 [file peerj-13-20052-s002.xlsx]

## Sheet: chlorophyll
st1	Absorbance			a	b	a+b	Carotenoids	mean	Mean of chl.	Mean of chl	Mean of chl..	Mean2
Treatment	665nm	649nm	470nm					Treatments	a	b	a+b	Caro
stems without galls	1.389	0.652	1.024	14.5958	5.9167	20.5125	2.49696	T1	14.3198	6.046	20.3657	2.5029
stems without galls	1.399	0.664	1.036	14.6834	6.10622	20.7896	2.47538	T2	8.77367	5.32293	14.0966	1.33069
stems without galls	1.308	0.641	1.047	13.6801	6.11507	19.7951	2.53636
stems with galls	0.844	0.484	0.722	8.65896	5.36132	14.0203	1.26475
stems with galls	0.861	0.472	0.733	8.88535	5.03194	13.9173	1.45966
stems with galls	0.857	0.498	0.741	8.77669	5.57552	14.3522	1.26766
										Stems without galls
										Stems with galls
	Chlorophyll a
	Chlorophyll b
	Total Chlorophyll a+b
	Carotenoids
		a
		b
		ab
		c

## Sheet: Hormones
Treatment	P1 Hormones (mg/100gm)
	IAA	GA3	ABA	column 2	IAA	….	st.dev	GA3	…..	st.dev3	ABA	…	st.dev4
stems without galls	0.319	0.121	0.131	Non-Infected	0.307333		0.0125831	0.144		0.0478435	0.126		0.005
stems without galls	0.294	0.199	0.121	Infected	0.716333		0.0205264	0.483667		0.0141892	0.869333		0.00351188
stems without galls	0.309	0.112	0.126
stems with galls	0.739	0.499	0.873
stems with galls	0.699	0.481	0.866
stems with galls	0.711	0.471	0.869
		Phytohormones
		Stems without galls
		Stems with galls
