# Supplementary material for: Insights into the interactions between Deverra tortuosa and Schizomyia buboniae: phytochemicals, antioxidant capacity, and enzyme inhibitory effects
Source: PeerJ. 2025 Nov 27;13:e20052. doi: 10.7717/peerj.20052 (PMC12665267; doi:10.7717/peerj.20052)
Supplement: Supplemental Information 3 [file peerj-13-20052-s003.xlsx]

## Sheet: catalase  
Catalase			result
treatments	before 60 sec	after 60 sec			Column 2	mean	st.dev
stems without galls	0.491	0.488	0.003	1.5	stems without galls	2	0.707107
stems without galls	0.49	0.485	0.005	2.5	stems with galls	3.75	0.353553
stems with galls	0.489	0.481	0.008	4
stems with galls	0.486	0.479	0.007	3.5
																									Lower Bound	Upper Bound
																				fw	w	-10.00000*	0.353553	1.06296e-06	-11.4071	-8.59291	1.40709
																					w	-10.00000*	0.353553	1.06296e-06	-11.4071	-8.59291
																					sp	-1	0.353553	0.177659	-2.40709	0.407088
																					sa	-2.50000*	0.353553	0.00310834	-3.90709	-1.09291
																					E	-1.50000*	0.353553	0.037989	-2.90709	-0.0929117
																				sa	fw	2.50000*	0.353553	0.00310834	1.09291	3.90709
																					w	-7.50000*	0.353553	5.86418e-06	-8.90709	-6.09291
																					sp	1.50000*	0.353553	0.037989	0.0929117	2.90709
																					c	2.50000*	0.353553	0.00310834	1.09291	3.90709
																					E	1	0.353553	0.177659	-0.407088	2.40709
																				E	fw	1.50000*	0.353553	0.037989	0.0929117	2.90709
																					w	-8.50000*	0.353553	2.79304e-06	-9.90709	-7.09291
																					sp	0.5	0.353553	0.720934	-0.907088	1.90709
																					c	1.50000*	0.353553	0.037989	0.0929117	2.90709
																					sa	-1	0.353553	0.177659	-2.40709	0.407088
																				*. The mean difference is significant at the 0.05 level.

## Sheet: peroxidase
p1 st2 peroxidase			result
treatments	before 60 sec	after 60 sec			Column 2	mean	st.dev
stems without galls	0.054	0.063	0.009	0.9	stems without galls	0.2	0.989949
stems without galls	0.054	0.049	-0.005	-0.5	stems with galls	0.45	0.0707107
stems with galls	0.05	0.054	0.004	0.4
stems with galls	0.053	0.058	0.005	0.5

## Sheet: Phenoloxidase
p1 st2 Phenoloxidase			result
treatments	before 60 sec	after 60 sec			Column 2	mean	st.dev
stems without galls	0.097	0.11	0.013	1.04	stems without galls	1.12	0.113137
stems without galls	0.076	0.091	0.015	1.2	stems with galls	1.4	0.169706
stems with galls	0.093	0.109	0.016	1.28
stems with galls	0.089	0.108	0.019	1.52

## Sheet: Superoxide dismutase
Superoxide dismutase
treatments	before 60 sec	after 60 sec	∆			mean	std.
stems without galls	0.154	0.16	0.006	1.2	stems without galls	1.1	0.141421
stems without galls	0.143	0.148	0.005	1	stems with galls	3	0.282843
stems with galls	0.151	0.165	0.014	2.8
stems with galls	0.165	0.181	0.016	3.2
			Stems without galls
			Stems with galls
